# Supplementary material for: SNP Genotyping Characterizes the Genome Composition of the New Baisary Fat-Tailed Sheep Breed
Source: MDPI journal article supplement (doi:10.3390/ani12111468), 2022-06-06

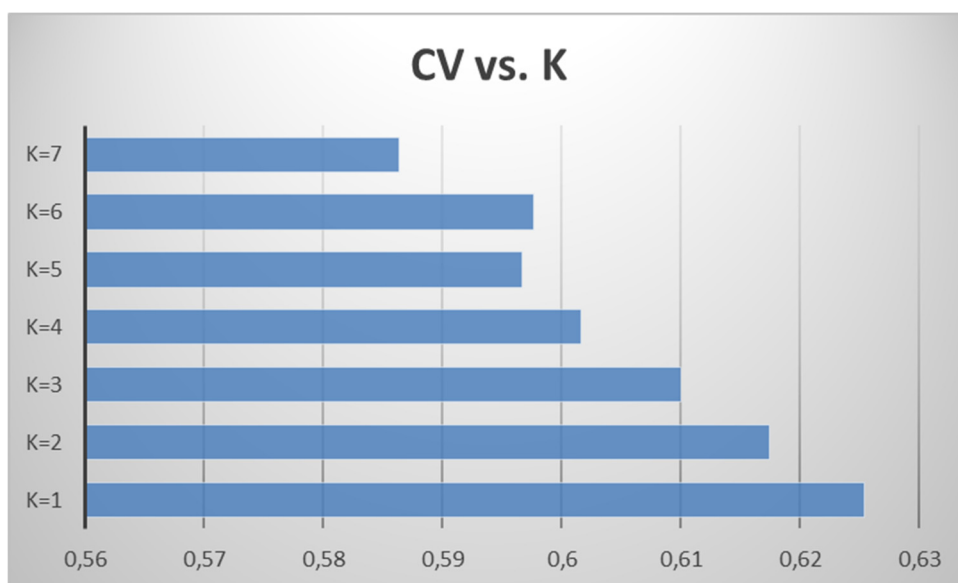

**Figure S1.** A graph should be given: cross-validation error vs. K.

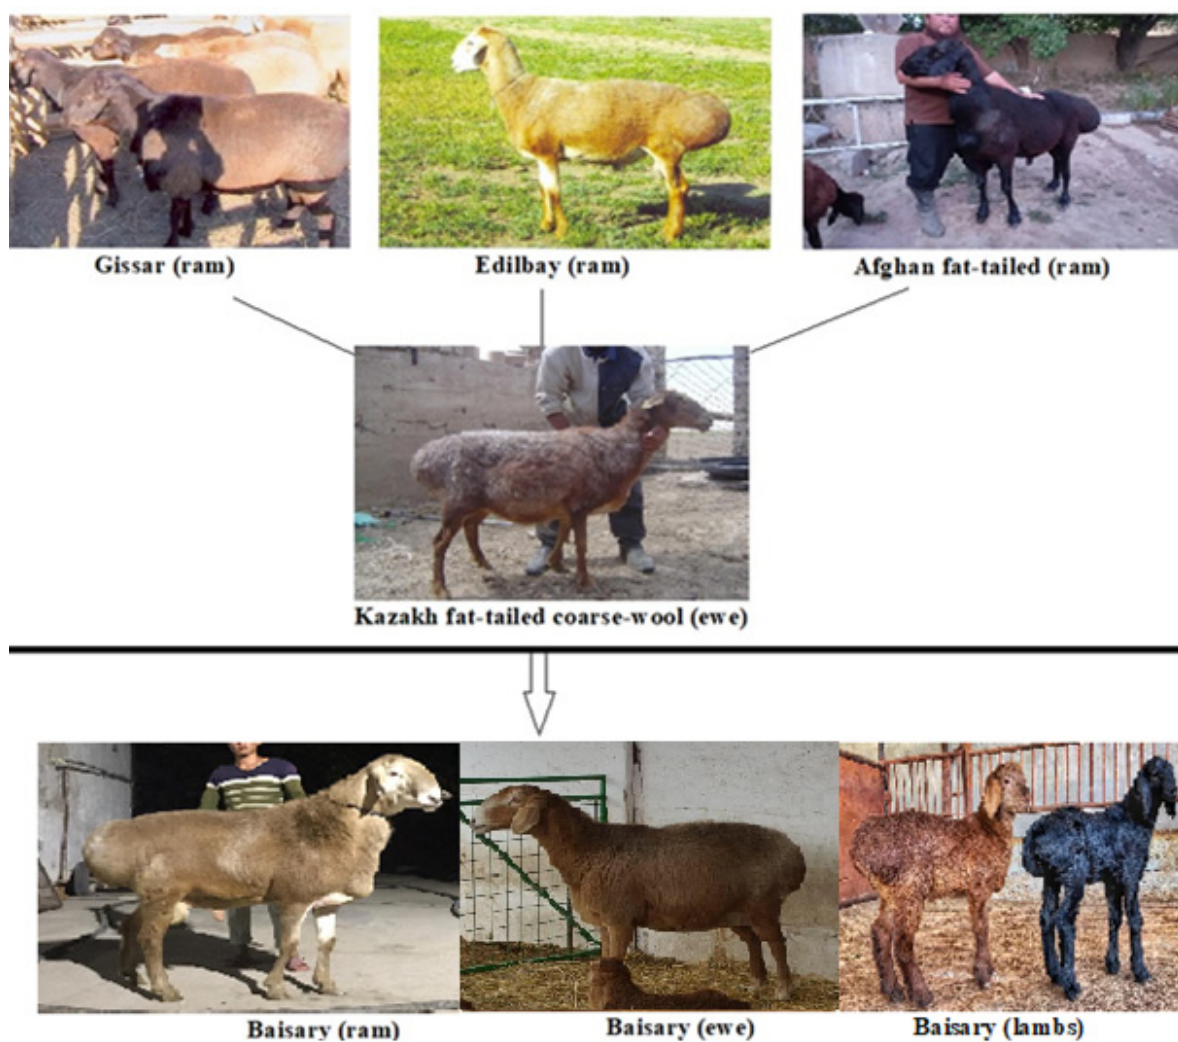

**Figure S2.** A typical ram and a typical ewe. Photo by Zhumadillaev N., Rustemov A. and Mykhtybayev K.

**Table S1.** Population pairwise differentiation in between breeds

| Pop ID  | AFTB           | AYKL           | ED             | Gissar2        | Baisary        | KMWB           | Gissar1        |
|---------|----------------|----------------|----------------|----------------|----------------|----------------|----------------|
| AFTB    | <b>0.00000</b> |                |                |                |                |                |                |
| AYKL    | 0.00286        | <b>0.00000</b> |                |                |                |                |                |
| ED      | 0.00608        | 0.00462        | <b>0.00000</b> |                |                |                |                |
| Gissar2 | -0.00182       | 0.00203        | 0.00499        | <b>0.00000</b> |                |                |                |
| Baisary | 0.00767        | 0.00996        | 0.01397        | 0.00533        | <b>0.00000</b> |                |                |
| KMWB    | 0.01444        | 0.00551        | 0.01733        | 0.01493        | 0.02346        | <b>0.00000</b> |                |
| Gissar1 | -0.00419       | 0.00520        | 0.00819        | -0.00019       | 0.00968        | 0.01695        | <b>0.00000</b> |

Afghan fat-tailed breed (AFTB), Aykol (AYKL), Edilbay (ED),  
Gissar2 (imported from Kyrgyzstan), Baisary (BAI), Kazakh meat-wool  
breed (KMWB), Gissar1 (imported from Tajikistan)

Additional pictures of Baisary sheep breed

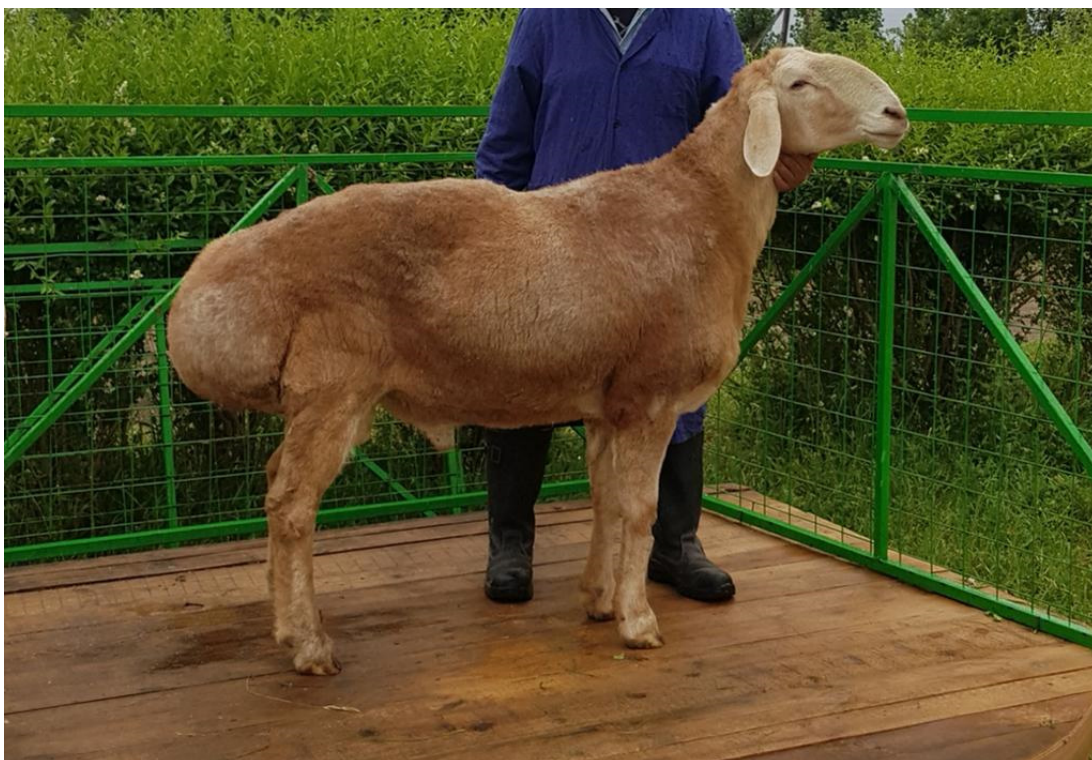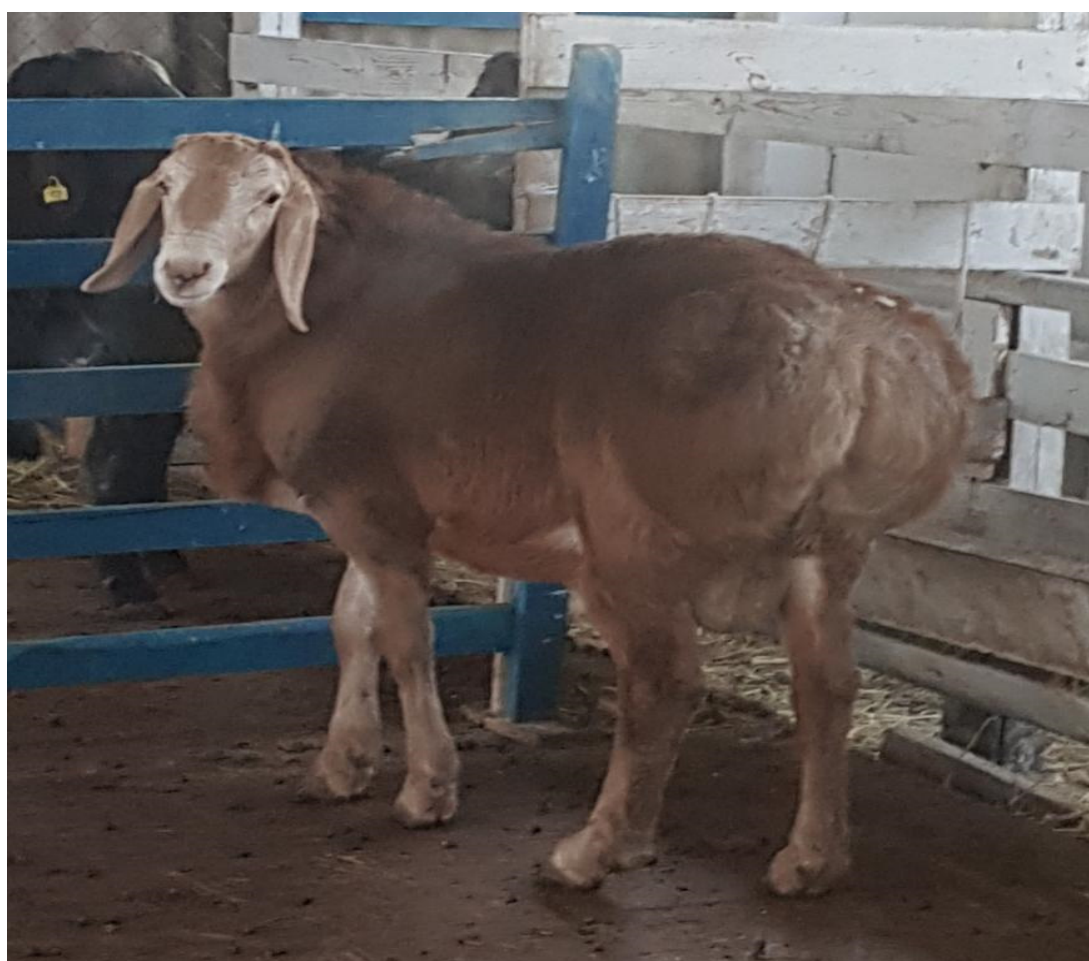



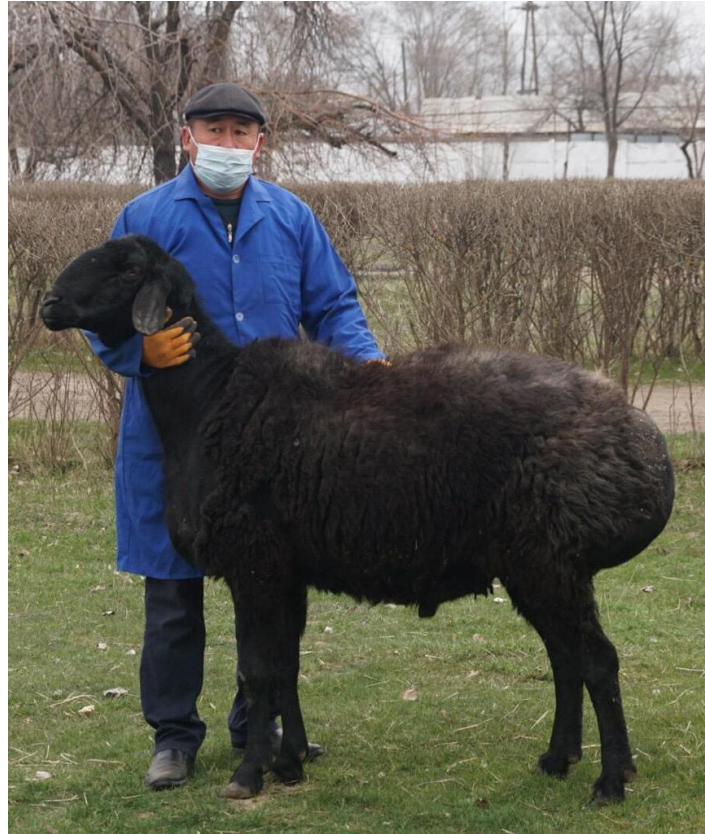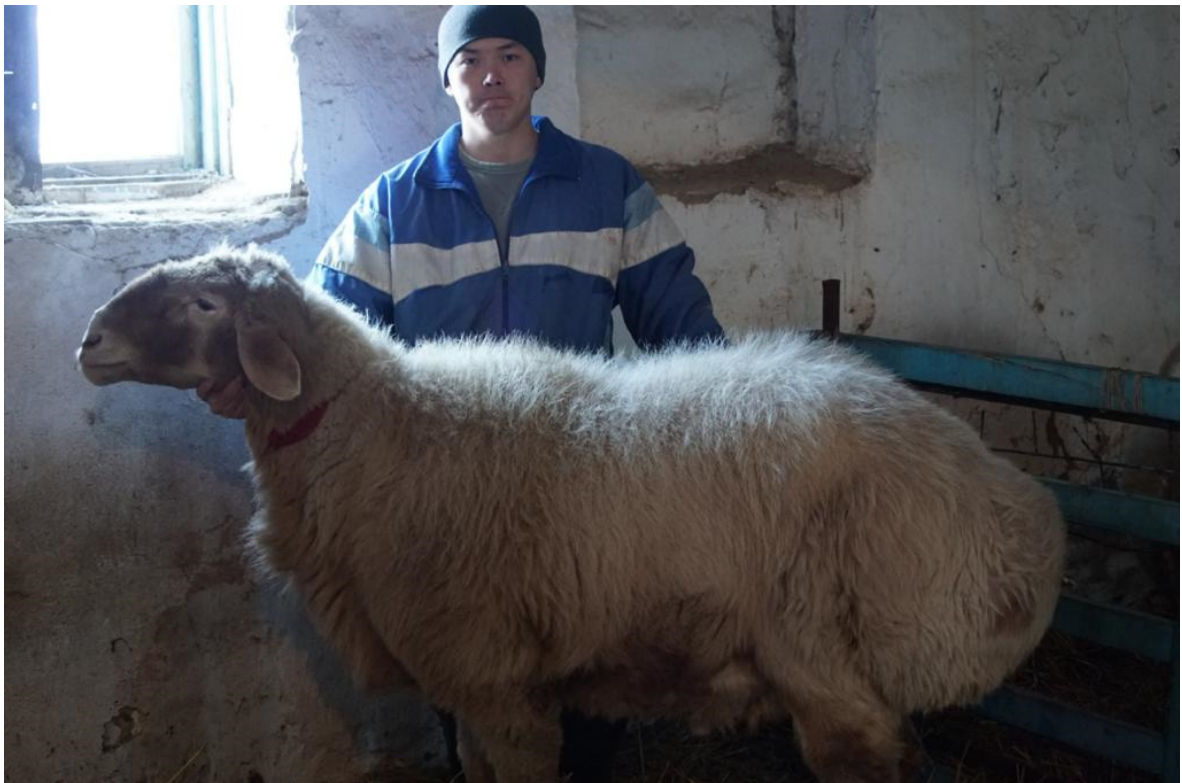

Supplement: s1 [file s1]
